1

1 **Systems biology of cold adaptation in the polyextremophilic red**  
2 **alga *Galdieria sulphuraria***

3

4

5 Alessandro W. Rossoni & Andreas P.M. Weber

6

7 Institute of Plant Biochemistry, Cluster of Excellence on Plant Sciences (CEPLAS), Heinrich  
8 Heine University, Universitätsstraße 1, 40225 Düsseldorf, Germany

9

10 **Corresponding author:** Prof. Dr. Andreas Weber,

11 E-mail: [andreas.weber@uni-duesseldorf.de](mailto:andreas.weber@uni-duesseldorf.de)

## 12 **Abstract**

13 Rapid fluctuation of environmental conditions can impose severe stress upon living organisms.  
14 Surviving such episodes of stress requires a rapid acclimation response, e.g., by transcriptional  
15 and post-transcriptional mechanisms. Persistent change of the environmental context, however,  
16 requires longer-term adaptation at the genetic level. Fast-growing unicellular aquatic  
17 eukaryotes enable analysis of adaptive responses at the genetic level in a laboratory setting. In  
18 this study, we applied continuous cold stress (28°C) to the thermoacidophile red alga *G.*  
19 *sulphuraria*, which is 14°C below its optimal growth temperature of 42°C. Cold stress was  
20 applied for more than 100 generations to identify components that are critical for conferring  
21 thermal adaptation. After cold exposure for more than 100 generations, the cold-adapted  
22 samples grew ~30% faster than the starting population. Whole-genome sequencing revealed  
23 757 variants located on 429 genes (6.1% of the transcriptome) encoding molecular functions  
24 involved in cell cycle regulation, gene regulation, signaling, morphogenesis, microtubule  
25 nucleation, and transmembrane transport. CpG islands located in the intergenic region  
26 accumulated a significant number of variants, which is likely a sign of epigenetic remodeling.  
27 We present 20 candidate genes and three putative cis-regulatory elements with various  
28 functions most affected by temperature. Our work shows that natural selection towards  
29 temperature tolerance is a complex systems biology problem that involves gradual  
30 reprogramming of an intricate gene network and deeply nested regulators.

31

32

## 33 **Keywords**

34 Microevolution; Cyanidiales; extremophile; temperature adaptation; cold stress; red algae

35

36

37

## 38 **Introduction**

39 Small changes in average global temperature significantly affect the species composition of  
40 ecosystems. Indeed, 252 Ma years ago up to ~95% of marine species and ~70% of terrestrial  
41 vertebrates ceased to exist (Benton, 2008; Sahney and Benton, 2008). This event, known as the  
42 Permian–Triassic extinction, was triggered by a sharp increase in worldwide temperature  
43 (+8°C) and CO<sub>2</sub> concentrations (+2000 ppm) during a period spanning 48,000–60,000 years  
44 (McElwain and Punyasena, 2007; Shen et al., 2011; Burgess et al., 2014). In comparison,  
45 atmospheric CO<sub>2</sub> has increased by ~100 ppm and the global mean surface temperature by ~1°C  
46 since the sinking of the Titanic in 1912, a little more than 100 years ago. Anthropogenic climate  
47 change and its consequences have become a major evolutionary selective force (Palumbi,  
48 2001). Higher temperatures and CO<sub>2</sub> concentrations result in increased seawater acidity,  
49 increased UV radiation, and changes in oceanwide water circulation and upwelling patterns.  
50 These rapid changes represent dramatically accelerating shifts in the demography and number  
51 of species, leading to loss of habitats and biodiversity (Hendry and Kinnison, 1999; Stockwell  
52 et al., 2003). A global wave of mass extinction appears inevitable (Kolbert, 2014). In this  
53 context, it is relevant to assess the effects of temperature change on genome evolution. Aquatic  
54 unicellular eukaryotes are particularly well-suited to addressing this question due to their short  
55 generation time and straightforward temperature control of their growth environment.

56  
57 Microorganisms rapidly acclimate and subsequently adapt to environmental change (López-  
58 Rodas et al., 2009; Huertas et al., 2011; Romero-Lopez et al., 2012; Osundeko et al., 2014;  
59 Foflonker et al., 2018). These adaptations are driven by natural selection and involve  
60 quantitative changes in allele frequencies and phenotype within a short period of time, a  
61 phenomenon known as microevolution. The *Galdieria* lineage comprise a monophyletic clade  
62 of polyextremophilic, unicellular red algae (Rhodophyta) that thrive in acidic and thermal  
63 habitats worldwide (e.g., volcanoes, geysers, acid mining sites, acid rivers, urban wastewaters,  
64 and geothermal plants) where they represent up to 90% of the total biomass, competing with  
65 specialized Bacteria and Archaea (Seckbach, 1972; Castenholz and McDermott, 2010).  
66 Accordingly, members of the *Galdieria* lineage can cope with extremely low pH values,  
67 temperatures above 50°C, and high salt and toxic heavy metal ion concentrations (Doemel and  
68 Brock, 1971; Castenholz and McDermott, 2010; Reeb and Bhattacharya, 2010; Hsieh et al.,  
69 2018). Some members of this lineage also occur in more temperate environments (Gross et al.,  
70 2002; Ciniglia et al., 2004; Qiu et al., 2013; Barcytè et al., 2018; Iovinella et al., 2018).

71

72 Our work systematically analyzed the impact of prolonged exposure to suboptimal (28°C) and  
73 optimal (42°C) growth temperatures on the systems biology of *Galdieria sulphuraria* for a  
74 period spanning more than 100 generations. We chose *Galdieria sulphuraria* as the model  
75 organism for this experiment due to its highly streamlined haploid genome (14 Mb, 6800 genes)  
76 that evolved out of two phases of strong selection for genome miniaturization (Qiu et al., 2015).  
77 In this genomic context, we expected maximal physiological effects of novel mutations, thus  
78 possibly reducing the fraction of random neutral mutations. Furthermore, we expected a smaller  
79 degree of phenotypical plasticity and hence a more rapid manifestation of adaptation at the  
80 genetic level.

81

## 82 **Materials and methods**

### 83 **Experimental design and sampling**

84 A starting culture of *Galdieria sulphuraria* strain RT22 adapted to growth at 42°C was split  
85 into two batches, which were grown separately at 42°C (control condition) and 28°C  
86 (temperature stress) for a period spanning 8 months. Bacteria were cultured on agar plates under  
87 non-photosynthetic conditions, with glucose (50 mM) as the sole carbon source. To select for  
88 fast-growing populations, the five largest colonies of each generation were picked. The samples  
89 were propagated across generations by iteratively picking the five biggest colonies from each  
90 plate and transferring them to a new plate. The picked colonies were diluted in 1 ml Allen  
91 Medium containing 25 mmol glucose. The OD<sub>750</sub> of the cell suspensions was measured at each  
92 re-plating step using a spectrophotometer. Approximately 1,000 cells were streaked on new  
93 plates to start the new generation. The remaining cell material was stored at -80°C until DNA  
94 extraction. This process was reiterated whenever new colonies with a diameter of 3 mm–5 mm  
95 became visible. During the 240 days of this experiment, a total of 181 generations of *Galdieria*  
96 *sulphuraria* RT22 were obtained for the culture grown at 42°C, whereas 102 generations were  
97 obtained for *Galdieria sulphuraria* RT22 grown at 28°C.

98

### 99 **DNA extraction and sequencing**

100 DNA from each sample was extracted using the Genomic-tip 20/G column (QIAGEN, Hilden,  
101 Germany), following the steps of the yeast DNA extraction protocol provided by the  
102 manufacturer. DNA size and quality were assessed via gel electrophoresis and Nanodrop  
103 spectrophotometry (Thermo Fisher, Waltham, MA, USA). TruSeq DNA PCR-Free libraries  
104 (insert size = 350 bp) were generated. The samples were quantified using the KAPA library  
105 quantification kit, quality controlled using a 2100 Bioanalyzer (Agilent, Santa Clara, CA,

106 USA), and sequenced on an Illumina (San Diego, CA, USA) HiSeq 3000 in paired-end mode  
107 (1x150bp) at the Genomics and Transcriptomics Laboratory of the Biologisch-Medizinisches  
108 Forschungszentrum in Düsseldorf, Germany. The raw sequence reads are retrievable from the  
109 NCBI's Small Read Archive (SRA) database (Project ID: PRJNA513153).

110

### 111 **Read mapping and variant calling**

112 Single nucleotide polymorphisms (SNPs) and insertions/deletions (InDels) were called  
113 separately on the dataset using the GATK software version 3.6-0-g89b7209 (McKenna et al.,  
114 2010). The analysis was performed according to GATKs best practices protocols (DePristo et  
115 al., 2011; Van der Auwera et al., 2013). The untrimmed raw DNA-Seq reads of each sample  
116 were mapped onto the genome of *Galdieria sulphuraria* RT22 (NCBI, SAMN10666930) using  
117 the BWA aligner (Li and Durbin, 2009) with the  $-M$  option activated to mark shorter split hits  
118 as secondary. Duplicates were marked using Picard tools  
119 (<http://broadinstitute.github.io/picard>). A set of known variants was bootstrapped for *Galdieria*  
120 *sulphuraria* RT22 to build the covariation model and estimate empirical base qualities (base  
121 quality score recalibration). The bootstrapping process was iterated three times until  
122 convergence was reached (no substantial changes in the effect of recalibration between  
123 iterations were observed, indicating that the produced set of known sites adequately masked the  
124 true variation in the data). Finally, the recalibration model was built upon the final samples to  
125 capture the maximum number of variable sites. Variants were called using the haplotype caller  
126 in discovery mode with  $-p$ loidy set to 1 (*Galdieria* is haploid) and  $-mbq$  set to 20 (minimal  
127 required Phred score) and annotated using snpEff v4.3i (Cingolani et al., 2012). The called  
128 variants were filtered separately for SNPs and InDels using the parameters recommended by  
129 GATK (SNPs: "QD < 1.0 || FS > 30.0 || MQ < 45.0 || SOR > 9 || MQRankSum < -4.0 ||  
130 ReadPosRankSum < -10.0", InDels: "QD < 1.0 || FS > 200.0 || MQ < 45.0 || MQRankSum < -  
131 6.5 || ReadPosRankSum < -10.0").

132

### 133 **Evolutionary pattern analysis**

134 A main goal of this analysis was implementation of a method that enabled discrimination  
135 between random variants and variants that may be connected to temperature stress (non-random  
136 variants). The following logic was implemented: All variants were transformed to binary code  
137 with regards to their haplotype towards the reference genome. When the haplotype was  
138 identical to the reference genome, "0" was assigned. Variant haplotypes were assigned "1".  
139 Random variants were gained and lost without respect to the sampling succession along the

140 timeline and the different temperature conditions. Consequently, a “fuzzy” pattern of, e.g.,  
141 “110011|0000”, would indicate a mutation between  $T_0$  and  $T_1$  in the samples taken at 28°C,  
142 which was lost in  $T_3$  and regained after  $T_5$ . The binary sequence represents the ten samples, six  
143 “cold” and four “warm”, according to their condition (“cold | warm”) and time point of  
144 sampling (“28°C\_1, 28°C\_2, 28°C\_3, 28°C\_4, 28°C\_5, 28°C\_6 | 42°C\_1, 42°C\_3, 42°C  
145 \_6, 42°C\_9”). Hence, the first six digits denote samples taken at 28°C, the latter four digits  
146 those taken at 42°C; “000000|0101” would represent a mutation in the  $T_2$  sample taken at 42°C  
147 that was lost in  $T_3$  and regained in  $T_4$ , and “011010|0101” would represent a variant that does  
148 neither with respect to the sampling succession (repeated gain and loss) nor the growth  
149 condition of the samples (mutation occurs at both temperatures). By contrast, variants that were  
150 gained and fixed in the subsequent samples of a certain growth condition were considered as  
151 “non-random variants” that may reflect significant evolutionary patterns. Thus, “111111|0000”  
152 would indicate that a mutation between  $T_0$  and  $T_1$  in the samples taken at 28°C was fixed over  
153 the measured period. Similarly, “000000|0111” would indicate a mutation between  $T_2$  and  $T_3$   
154 in the samples taken at 42°C that was fixed throughout the generations. As such, it was possible  
155 to determine all possible pattern combinations for non-random evolutionary patterns. The  
156 binary sequence “111111|1111” represented the case where all ten samples contained a different  
157 haplotype when compared to the reference genome. In this specific case, systematic  
158 discrepancies between the reference genome and the DNA-Seq reads are the cause of this  
159 pattern. Variants following the “111111|1111” pattern were removed from the dataset.

160

#### 161 **Data accession**

162 The DNA sequencing results are described in Supplementary Table S1. The Illumina  
163 HiSeq3000 raw reads reported in this project have been submitted to the NCBI’s Sequence  
164 Read Archive (SRA) and are retrievable (FASTQ file format) via BioProject PRJNA513153  
165 and BioSamples SAMN10697271 - SAMN10697280.

166

#### 167 **Statistical analysis**

168 Various statistical methods were applied for the different analyses performed in this project.  
169 Culture growth was measured for at 28°C ( $n = 6$ ) and at 42°C ( $n = 10$ ). Both datasets failed the  
170 Shapiro-Wilk normality test ( $p > 0.05$ ) and showed a visible trend over time. The difference in  
171 growth between the populations was tested using the Wilcoxon rank sum test. Further, timepoints  
172 along a timeline constitute a dependent sampling approach by which the growth performance  
173 of an earlier timepoint is likely to influence the the growth performance of a later timepoint.

174 Trends in growth over the period of this experiment were tested for significance using  
175 Jonckheere-Terpstra's test for trends. Enrichment of GO categories as well as *k*-mer enrichment  
176 was tested using Fisher's exact test for categorical data, corrected for multiple testing according  
177 to Benjamini-Hochberg. The contingency table was set up in such way that the number of times  
178 a specific GO was affected by variants was compared with the number of times the same GO  
179 was not affected by variants. This category was compared against the "background" consisting  
180 of all other GOs affected by variants and all other unaffected GOs. The same methodology was  
181 applied for *k*-mer enrichment testing. Differential gene expression based on previously  
182 collected data (Rossoni et al., 2018) was calculated with EdgeR (Robinson et al., 2010)  
183 implementing the QLF-test in order to address the dispersion uncertainty for each gene (Lun et  
184 al., 2016). All samples taken at 28°C were compared against all samples taken at 42°C/46°C.

185

## 186 **Results**

### 187 **Culture growth**

188 Samples grown at 42°C were re-plated 10 times during the 7 months of the experiment due to  
189 faster colony growth, whereas cultures growing at 28°C were re-plated only six times (**Figure**  
190 **1A**). Cultures grown at 42°C achieved an average doubling time of 1.32 days, equivalent to an  
191 average growth rate of 0.81/day. Cultures grown at 28°C had an average doubling time of 2.70  
192 days, equivalent to an average growth rate of 0.39/day. This difference in doubling time/growth  
193 rate between 28°C and 42°C was significant (non-normal distribution of growth rates,  
194 Wilcoxon rank sum test,  $p = 0.0002$ ) (**Figure 1B**). The growth rates reported here were slightly  
195 lower than in liquid batch cultures, where growth rates of 0.9/day–1.1/day were measured for  
196 heterotrophic cultures grown at 42°C (unpublished data). The changes in growth rate over time  
197 were also compared using linear regression (**Figure 1C**). Although the linear regression appears  
198 to indicate increasing doubling times in samples grown at 42°C, Jonckheere's test for trends  
199 revealed no significant trend in this dataset (Jonckheere-Terpstra,  $p > 0.05$ ). By contrast,  
200 samples grown at 28°C gradually adapted to the colder environment and significantly  
201 (Jonckheere-Terpstra,  $p < 0.05$ ) decreased their doubling time by ~30% during the measured  
202 period.



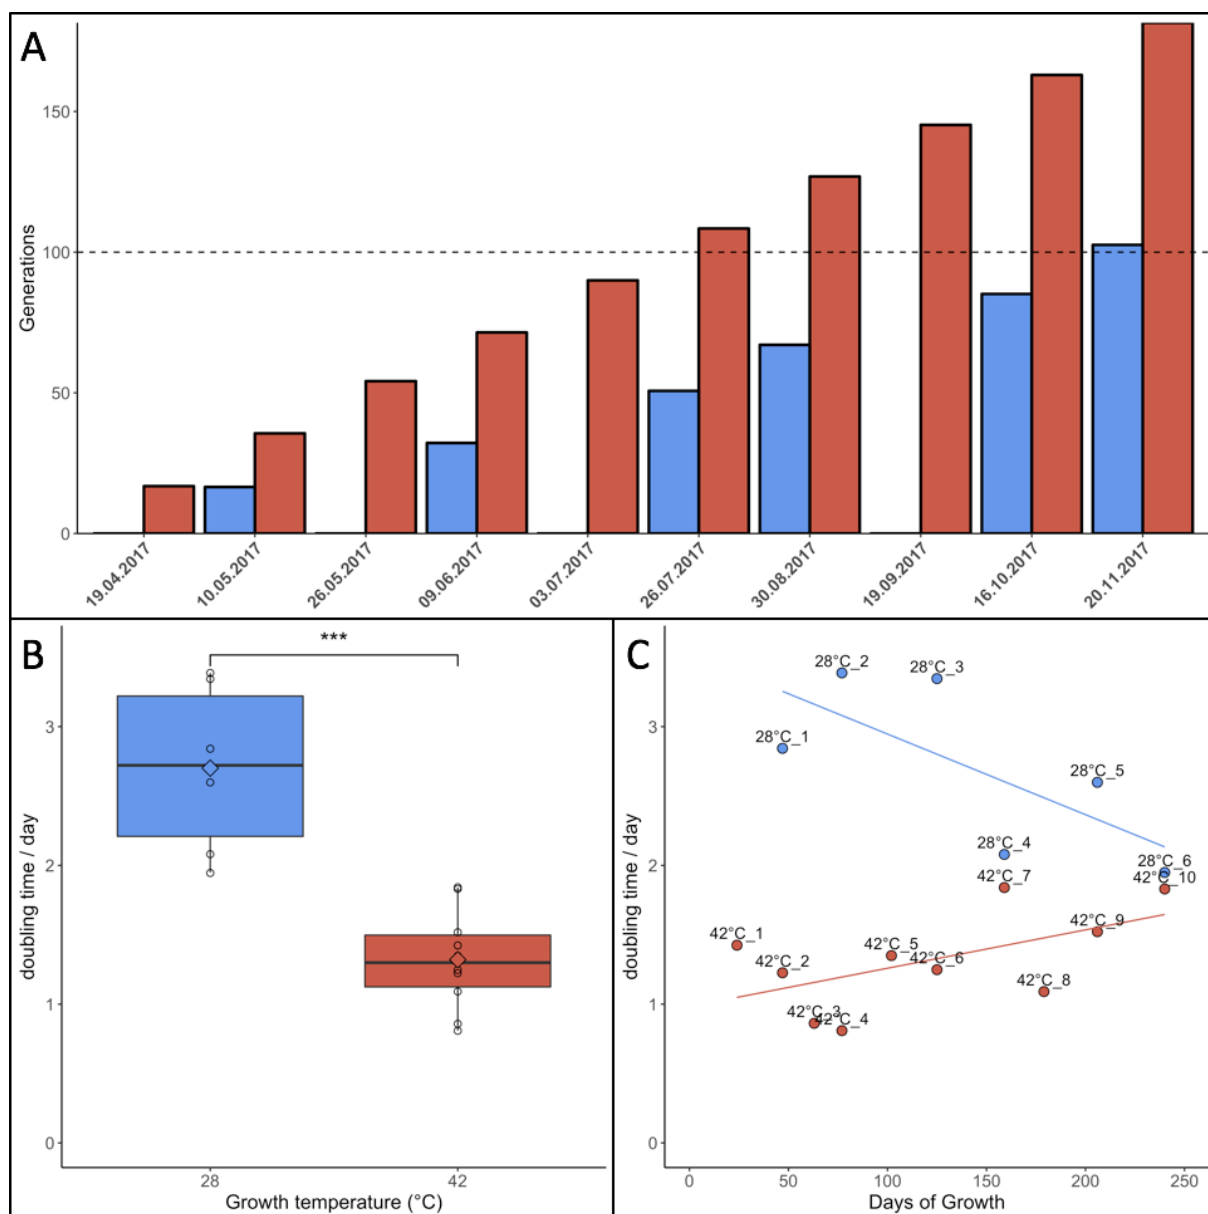

203  
 204 **Figure 1.** Growth parameters of *Galdieria sulphuraria* RT22. **A:** Cultures were grown heterotrophically at 28°C  
 205 (blue) and at 42°C (red) on plates made of 1.5% Gelrite mixed 1:1 with 2× Allen Medium containing 50 mM  
 206 glucose. The fastest growing colonies were iteratively selected and re-plated over a period of ~7 months until >100  
 207 generations were achieved under both conditions. Propagation occurred through picking the five biggest colonies  
 208 from each plate and transferring them to a new plate. **B:** The doubling time at 42°C was 1.32 days on average. The  
 209 doubling time at 28°C was 2.70 days on average. The differences in growth between 42°C and 28°C were  
 210 significant (Wilcoxon rank sum test,  $p = 0.0002$ ). Cultures grown at 42°C were re-plated 10 times due to faster  
 211 growth. In comparison, cultures growing at 28°C were re-plated only six times. **C:** Samples grown at 42°C grew  
 212 slightly slower over time. By contrast, samples grown at 28°C appeared to decrease their doubling time. While no  
 213 statistically significant trend could be detected at 42°C, Jonckheere's test for trends reported a significant trend  
 214 towards faster growth for the populations grown at 28°C.  
 215

## 216 Variant calling

217 A total of 470,680,304 paired-end DNA-Seq reads were generated on an Illumina HiSeq 3000  
 218 sequencer. Of these, 462,869,014 were aligned to the genome (98.30%) using BWA  
 219 (**Supplementary Table S1**). The average concordant alignment rate was 99.71%. The average  
 220 genome coverage was 444× (min = 294×, max = 579×). At least 95.5% of the sequence was



221 covered with a depth of >20x. GATK's haplotype caller algorithm reported 6,360 raw SNPs  
 222 and 5,600 raw InDels. The SNPs and InDels were filtered separately according to GATK's best  
 223 practice recommendations. A total of 1,864 SNPs and 2,032 InDels passed the filtering process.  
 224 On average, one SNP occurs every 16,177 nt and one InDel every 44,394 nt. Overall, 66.17%  
 225 of the filtered variants (2578/3896) were classified as background mutations being at variance  
 226 with the genome reference ("111111|1111"). The 1243 remaining variants (966 SNPs + 277  
 227 InDels) were sorted according to their evolutionary patterns, here called "Random", "Hot", and  
 228 "Cold" (**Figure 2**); 486/1243 (36.5%) are located in the intergenic region and the other  
 229 757/1243 (63.5%) in the genic region, including 5'UTR, 3'UTR, and introns. In addition,  
 230 1202/1243 (96.7%) variants followed random gain and loss patterns that do not exhibit relevant  
 231 evolutionary trajectories (**Figure 2**). The remaining 41 variants were gained and fixed over  
 232 time, thus representing non-random, evolutionary relevant variants. Twenty-three variants were  
 233 fixed at 28°C and 18 variants at 42°C. Consequently, 23 variants (1.9%) were attributed to the  
 234 "Cold" pattern (11 intergenic, 12 genic) and 18 variants to the "Hot" pattern (1.4%).  
 235

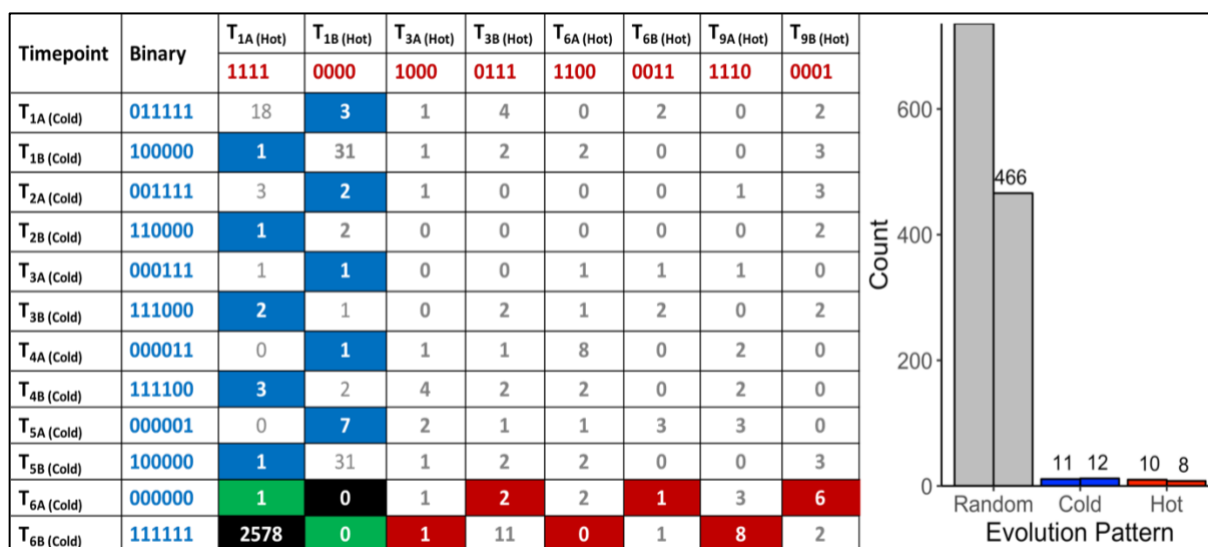

236  
 237 **Figure 2.** "Random" and "Non-random" variant acquisition patterns. "Non-random" variants were defined  
 238 as mutations gained at some point during growth at 42°C or 28°C, and fixed in the genome of *G. sulphuraria*  
 239 *RT22* during the remaining time points. All variants were translated into binary code according to their  
 240 haplotype relative to the reference genome. "Cold": variant was obtained and fixed at 28°C. "Hot": variant  
 241 was obtained and fixed at 42°C. **Left:** Evolutionary patterns and their frequencies. In the specific case of  
 242 patterns "111111|0000" and "000000|1111", a variant was already gained before the first sampling time  
 243 point. Hence, it was not possible to determine the condition at which the variant was gained. "Background"  
 244 mutations represent the cases where the sequence of all samples was in disagreement with the reference  
 245 genome "111111|1111". The remaining combinations were considered as "random" evolution patterns. Here,  
 246 variants were gained but not fixed in the subsequent samples of the same growth condition. The numbers  
 247 in the boxes indicate the count of a specific pattern. **Right:** Count by variant type. The right column of each  
 248 category indicates the number of variants located in the intergenic space. The left column counts the number  
 249 of variants located in the coding sequence.

250  
 251  
 252

253

254 **GO enrichment-based overview of cellular functions most affected by variants**

255 The vast majority of the 757 genic variants was not fixed over time and did not follow consistent  
256 evolutionary patterns (**Figure 2**). However, the frequency at which genes and gene functions  
257 were affected by mutation can serve as an indicator of the physiological processes most affected  
258 by evolutionary pressure at 28°C and 42°C. Here, we analyzed the functional annotations of the  
259 757 variants located on 429 genes (6.1% of the transcriptome) using GO-Term (GO)  
260 enrichment analysis. A total of 1602 unfiltered GOs were found within the genes affected by  
261 variants (27.3% of all GOs in *G. sulphuraria* RT22), of which 1116 were found at least twice  
262 in the variant dataset. Of those, 234 of the GOs were significantly enriched (categorical data,  
263 "native" vs. "HGT", Fisher's exact test, Benjamini-Hochberg,  $p \leq 0.05$ ).

264  
265

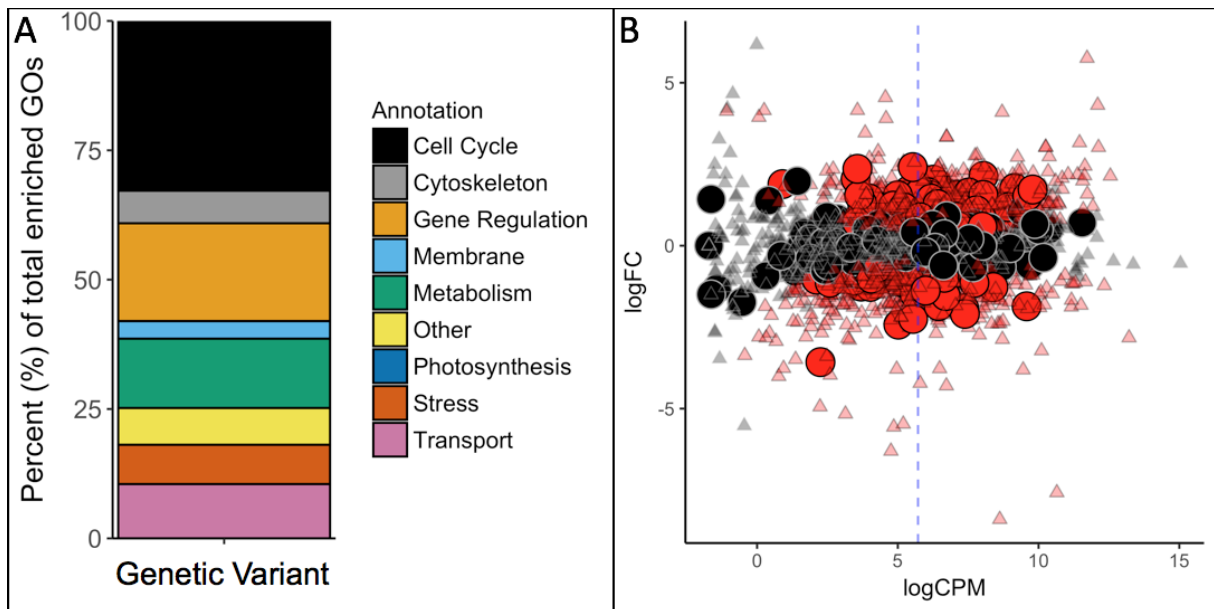

266  
267

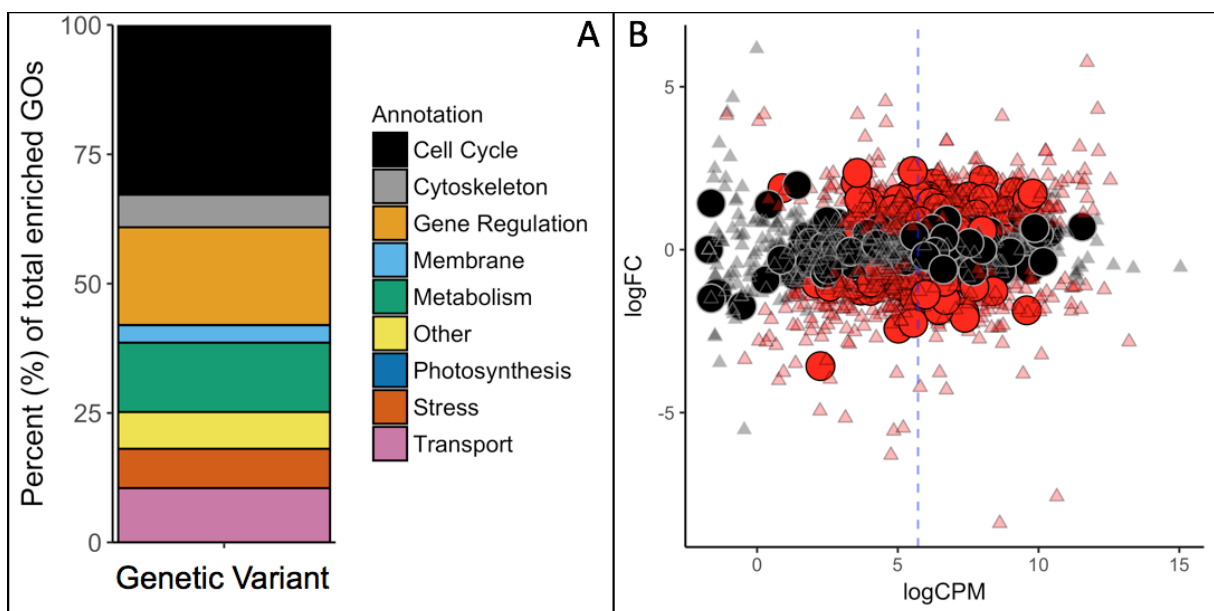

**Figure 3. A:** GO-Term (GO) enrichment analysis revealed the cellular functions most affected by mutations. Each

268 GO was manually revised and attributed to one of the nine categories contained in the legend. **B:** Differential gene  
269 expression in *G. sulphuraria* RT22 orthologs in *G. sulphuraria* 074W (reciprocal best blast hit), here measured as  
270 log -fold change (logFC) vs. transcription rate (logCPM). Differentially expressed genes are colored red (quasi-  
271 likelihood F-test, Benjamini-Hochberg,  $p \leq 0.01$ ). Genes affected by variants are shown by large circles. Genes  
272 without significant differential expression are represented by triangles. The blue dashes indicate the average  
273 logCPM of the dataset. The orthologs in *G. sulphuraria* 074W of genes affected by variance in *G. sulphuraria*  
274 RT22 did not show more, or less, differential expression under fluctuating temperature.

275  
276 To contextualize the function in broader categories, we manually sorted all significantly  
277 enriched GOs into the following ten categories: “Cell Cycle”, “Cytoskeleton”, “Gene  
278 Regulation”, “Membrane”, “Metabolism”, “Photosynthesis”, “Stress/Signaling”, “Transport”,  
279 “Other”, and “NA” (**Figure 3A**). GO terms belonging to the “NA” category were considered  
280 meaningless and excluded from the analysis (e.g., “cell part” [GO:0044464], “biological  
281 process” [GO:0008150], “binding” [GO:0005488], “ligase activity” [GO:0016874]).

282  
283 **Cell cycle:** Functions related to the cell cycle accounted for 79/234 (**33.8%**) of the enriched  
284 GOs. Mitosis was affected at every stage: initiation (e.g., “positive regulation of cell  
285 proliferation”, GO:0008284,  $p = 0.0024$ ; “re-entry into mitotic cell cycle”, GO:0000320,  $p =$   
286  $0.0405$ ), DNA replication (e.g., “DNA replication, removal of RNA primer”, GO:0043137,  $p =$   
287  $0.0001$ ; “ATP-dependent 5'-3' DNA helicase activity”, GO:0043141,  $p = 0.014$ ), prophase  
288 (“preprophase band”, GO:0009574,  $p = 0.0270$ ), metaphase (e.g., “attachment of mitotic  
289 spindle microtubules to kinetochore”, GO:0051315,  $p = 0.0142$ ), anaphase (e.g., “mitotic  
290 chromosome movement towards spindle pole”, GO:0007079,  $p = 0.0134$ ), and telophase  
291 (“midbody”, GO:0030496,  $p = 0.0404$ ). Mutations also accumulated in genes controlling cell  
292 cycle checkpoints of mitosis (e.g., “positive regulation of mitotic metaphase/anaphase  
293 transition, GO:0045842,  $p = 0.0270$ ; “mitotic spindle assembly checkpoint”, GO:0007094,  $p =$   
294  $0.0441$ ).

295 Genes with functions involved in cell differentiation and maturation of *Galdieria* were  
296 also affected significantly by microevolution during organellogenesis (e.g., “regulation of auxin  
297 mediated signaling pathway”, GO:0010928,  $p = 0.0012$ ; “phragmoplast”, GO:0009524,  $p =$   
298  $0.0405$ ; “xylem and phloem pattern formation”, GO:0010051,  $0.0012$ ), cell polarity (e.g.,  
299 “establishment or maintenance of epithelial cell apical/basal polarity”, GO:0045197,  $p =$   
300  $0.0012$ ; “growth cone”, GO:0030426,  $p = 0.0096$ ), and subcellular compartmentalization and  
301 localization (“Golgi ribbon formation”, GO:0090161,  $p = 0.0404$ ; “establishment of protein  
302 localization”, GO:0045184,  $p = 0.0124$ ). Interestingly, some transcriptional regulators of cell  
303 growth seem to be conserved across the eukaryotic kingdom. GOs such as “branching involved  
304 in open tracheal system development” (GO:0060446,  $p = 0.0012$ ) and “eye photoreceptor cell

305 development” (GO:0042462,  $p = 0.0093$ ) were also found, indicating high amino acid sequence  
306 similarity within this category. Further, temperature stress altered genes with functions  
307 involved in cell death (e.g., “cell fate determination”, GO:0001709,  $p = 0.0012$ ; “Wnt  
308 signalosome”, GO:1990909,  $p = 0.0405$ ).

309  
310 **Gene regulation:** Maintenance of steady and balanced reaction rates across cellular systems is  
311 essential for cell survival and poses a major challenge when an organism is confronted with  
312 changes in temperature (D'Amico et al., 2002). In this context, the second largest category  
313 within the enriched GO terms (49/234, **20.9%**) was related to gene regulation. Besides cell  
314 cycle control, thermal adaptation and evolution was orchestrated predominantly through  
315 mutations in genes involved in controlling the expression profiles of other genes (“gene  
316 expression”, GO:0010467,  $p = 0.0118$ ). Also, we found a significant proportion of mutations  
317 affecting genes linked to the epigenetic control of gene expression, which can occur through  
318 methylation of DNA (“hypermethylation of CpG island”, GO:0044027,  $p = 0.0086$ ), as well as  
319 modulation of chromatin density and histone interactions that change the accessibility of whole  
320 genomic regions to transcription (“H4 histone acetyltransferase activity”, GO:0010485,  $p =$   
321  $0.0040$ ) (Jenuwein and Allis, 2001; Bird, 2002). Further, variants may have altered RNA  
322 polymerase efficiency (e.g., “RNA polymerase II transcription factor binding”, GO:0001085,  
323  $p = 0.0020$ ), mRNA processing (e.g., “regulation of RNA splicing”, GO:0043484,  $p = 0.0025$ ),  
324 post-transcriptional silencing (e.g., “RNA interference”, GO:0016246,  $p = 0.0093$ ) as well as  
325 alteration of ribosome structure components (e.g., “structural constituent of ribosome”,  
326 GO:0003735,  $p = 0.0336$ ) and rRNA methylation components (e.g., “rRNA methylation”,  
327 GO:0031167,  $p = 0.0036$ ). In this regard, GO terms linked to posttranslational protein  
328 modification were also enriched (“positive regulation of peptidyl-threonine phosphorylation”,  
329 GO:0010800,  $0.0086$ ; “N-terminal peptidyl-methionine acetylation”, GO:0017196,  $p =$   
330  $0.0007$ ).

331  
332 **Cytoskeleton:** Microtubuli are long polymers of tubulin that are constituents of the  
333 cytoskeleton of every eukaryote. They play a central role in intracellular organization, stability,  
334 transport, organelle trafficking, and cell division (Brouhard and Rice, 2018). Because they  
335 associate spontaneously, microtubular assembly (e.g., “microtubule nucleation”, GO:0007020,  
336  $p = 0.0039$ ) and disassembly are mostly driven by tubulin concentrations at the beginning and  
337 the end of microtubules once a critical microtubule size is reached (Voter and Erickson, 1984).  
338 However, the first steps of microtubule assembly are kinetically unfavorable. Cells solve this

339 issue by using  $\gamma$ -tubulin ring complex as a template (e.g., “tubulin complex”, GO:0045298,  $p =$   
340 0.0031). The reaction equilibrium between tubulin polymerization and monomerization is  
341 temperature-dependent and requires accurate regulation (e.g., “tau-protein kinase activity”,  
342 GO:0050321, 0.0086). Shifting temperatures from 37°C to 25°C leads to massive microtubular  
343 dissociation in homoeothermic species (Himes and Detrich, 1989). Additionally, tubulin  
344 adaptations towards lower temperatures have been observed at the level of DNA sequence as  
345 well as at the epigenetic level in psychrophilic organisms (Detrich et al., 2000). Microtubule  
346 metabolism and its role in cellular physiology accounted for 13/234 (**5.6%**) of the enriched  
347 GOs.

348  
349 **Membranes and transport:** Another major component that is also influenced by temperature  
350 is cell integrity with regards to membrane fluidity (5/234 enriched GOs, **2.1%**) and transport  
351 (25/234 enriched GOs, **10.7%**). Cell membranes are selectively permeable and vital for  
352 compartmentation and electric potential maintenance. In this context, *Galdieria* is able to  
353 maintain near-neutral cytosolic pH against a  $10^6$ -fold  $H^+$  gradient across its plasma membrane  
354 (Gross, 2000). Membranes maintain a critical range of viscosity to be able to incorporate  
355 molecules and transport substrates and nutrients. The fluidity of a membrane is mainly  
356 determined by its fatty acid composition. Changes in temperature lead to changes in fatty acid  
357 composition, which in turn affect hydrophobic interactions as well as the stability and  
358 functionality of membrane proteins and proteins anchored to membranes. Here, we measured a  
359 significant enrichment in genes with functions connected to membrane lipid bilayers (e.g.,  
360 “membrane”, GO:0016020,  $p = 0.0002$ ; “mitochondrial inner membrane”, GO:0005743,  $p =$   
361 0.0023) as well as membrane-associated proteins (e.g., “integral component of membrane”,  
362 GO:0016021,  $p < 0.0001$ ), transporters (e.g., “amino acid transmembrane transporter activity”,  
363 GO:0015171,  $p = 5.79568E-06$ ), and transport functions (e.g., “transmembrane transport”,  
364 GO:0055085,  $p = 0.0001$ ; “cation transport”, GO:0006812,  $p = 0.0028$ ). Furthermore,  
365 temperature imposes significant restrictions to vesicles, which play a central role in molecule  
366 trafficking between organelles and in endocytosis. Vesicle formation in particular appears to be  
367 affected by temperature (e.g., “vesicle organization”, GO:0016050,  $p = 0.0012$ ; “clathrin-  
368 coated endocytic vesicle membrane”, GO:0030669,  $p = 0.0025$ ).

369  
370 **Stress and signaling:** Cell signaling comprises the transformation of information, such as  
371 environmental stress, to chemical signals that are propagated and amplified through the system  
372 where they contribute to the regulation of various processes (e.g., “response to stress”,



373 GO:0006950,  $p = 0.0051$ ; “hyperosmotic response”, GO:0006972,  $p = 0.0039$ ; “ER overload  
374 response”, GO:0006983,  $p = 0.0040$ ). Here, we found a total of 18/234 GOs (**7.7%**) derived  
375 from genes involved in cell signaling upon which temperature changes appeared to exhibit  
376 significant evolutionary pressure driving the accumulation of variants. A broad array of  
377 receptors (G-protein coupled, tyrosine kinases, and guanylate cyclases) performs signal  
378 transduction through phosphorylation of other proteins and molecules. The signal acceptors, in  
379 turn, influence second messengers and further signaling components that affect gene regulation  
380 and protein interactions. GO annotations indicate involvement of temperature in genes coding  
381 for receptors (e.g., “activation of protein kinase activity”, GO:0032147,  $p = 4.95227E-05$ ;  
382 “protein serine/threonine/tyrosine kinase activity”, GO:0004712,  $p = 0.00045547$ ; “protein  
383 autophosphorylation”, GO:0046777,  $p = 1.53236E-06$ ) as well as in genes coding for the signal  
384 acceptors (“stress-activated protein kinase signaling cascade”, GO:0031098,  $p = 6.45014E-06$ ;  
385 “cellular response to interleukin-3”, GO:0036016,  $p = 5.05371E-06$ ; “regulation of abscisic  
386 acid-activated signaling pathway”, GO:0009787,  $p = 0.006712687$ ).

387  
388 **Metabolism:** Maintaining metabolic homeostasis is paramount for organism survival. The  
389 efficiency, speed, and equilibrium of metabolic pathways are modulated by enzymes and the  
390 specific kinetics of each reaction. Whereas microorganisms are not capable of controlling the  
391 amount of free enthalpy in their systems (chemical equilibria are temperature-dependent,  
392  $\Delta G = -RT \ln K$ ), they are able to actively adjust their metabolic rates by regulating the amount  
393 of available enzyme (“Gene Expression”). Passively, mutations can alter enzyme structure,  
394 thereby adjusting the affinity of enzymes towards ligands. Variants affecting the genetic code  
395 of genes attributed to this category influence a broad variety of metabolic pathways (e.g.,  
396 “cellular aromatic compound metabolic process”, GO:0006725,  $p = 0.0030$ ; “amine metabolic  
397 process”, GO:0009308,  $p < 0.0001$ ) in both anabolism (e.g., “peptidoglycan biosynthetic  
398 process”, GO:0009252,  $p = 0.0015$ ; “glycerol biosynthetic process”, GO:0006114,  $p = 0.0086$ ),  
399 and catabolism (e.g., “glycosaminoglycan catabolic process”, GO:0006027,  $p = 0.0011$ ). In  
400 spite of pronounced changes in gene expression of metabolic enzymes during short-term cold  
401 stress in *Galdieria sulphuraria* 074W (Rossoni et al., 2018) and *Cyanidioschyzon merolae* 10D  
402 (Nikolova et al., 2017), microevolution of genes directly involved in metabolic steps appeared  
403 to play a minor role in long-term temperature adaptation (34/234 GOs, **14.5%**).

404  
405 **Photosynthesis** The majority of photosynthetic light reactions are catalyzed by enzymes  
406 located in the photosynthetic thylakoid membranes. Hence, photosynthesis is based upon

407 temperature-dependent proteins located in temperature-dependent membranes (Yamori et al.,  
408 2014). Abnormal temperatures affect the electron transport chain between the various  
409 components of the photosynthetic process (Hew et al., 1969). If the electron transport chain  
410 between photosystem I (PSI) and photosystem II (PSII) is uncoupled, electrons are transferred  
411 from PSI to oxygen instead of PSII. This process is also known as PSII excitation pressure and  
412 leads to a boost of reactive oxygen species. Long-term microevolution did not appear to  
413 significantly affect the photosynthetic apparatus of *Galdieria sulphuraria* RT22 (3/234, **1.3%**),  
414 likely because the experiment was performed under heterotrophic conditions in continuous  
415 darkness.

416

### 417 **Variant hotspots and non-random genic variants**

418 To further investigate the temperature adaptation of *Galdieria sulphuraria* RT22, we selected  
419 candidate genes for closer analysis using two different approaches. First, we assumed that high  
420 mutation rates in a specific gene reflect increased selective force upon its function and  
421 regulation. To identify potential targets of temperature-dependent microevolution, we searched  
422 for “variant hotspots”, here defined as the 99<sup>th</sup> percentile of genes most affected by variants.  
423 We computed variant number-dependent Z-scores for each gene and extracted genes with a Z-  
424 Score > 2.575. This procedure led to identification of seven genes, so-called “variant hotspots”,  
425 containing at least seven independent variants per gene. Next, we extracted 41 variants that  
426 followed non-random evolutionary patterns, here defined as the gain of a variant and its fixation  
427 in the subsequent samples that was exclusive to either 28°C or 42°C (**Figure 2**). Eighteen  
428 variants followed an evolutionary pattern defined as “Hot” (1.36%) and 23 variants followed  
429 an evolutionary pattern defined as “Cold” (1.59%). These non-random evolutionary patterns  
430 describe the gain of a variant and its fixation over time either in the 42°C dataset (“Hot”, e.g.,  
431 000000|0001, 000000|0011), or in the 28°C dataset (“Cold”, e.g., 000001|0000, 000011|0000),  
432 respectively. The underlying assumption was that this subset represented beneficial mutations.  
433 Synonymous variants were removed from further analysis. As a result, we obtained 13 genes  
434 that followed non-random evolutionary patterns (16 non-synonymous variants). An individual  
435 functional characterization of each gene is contained in the supplementary material  
436 (**Supplementary Listing S1A** for “variant hotspots” and **Supplementary Listing S1B** for  
437 “non-random” genic variants).

438

439 The gene function of the selected temperature-dependent gene candidates broadly replicated  
440 the results of the GO enrichment analysis. Here, we found multiple enzymes involved in cell



441 cycle control and signaling, e.g., an oxidase of biogenic tyramine (Gsulp\_RT22\_67\_G1995),  
442 an armadillo/beta-catenin repeat family protein (Gsulp\_RT22\_107\_G5273), the GTPase-  
443 activating ADP-ribosylation factor ArfGAP2/3 (Gsulp\_RT22\_82\_G3036), and a peptidylprolyl  
444 cis-trans isomerase (Gsulp\_RT22\_64\_G1844). Other candidate genes were involved in  
445 transcription and translation, e.g., a NAB3/HDMI transcription termination factor  
446 (Gsulp\_RT22\_83\_G3136), or in ribosomal biogenesis (Gsulp\_RT22\_112\_G5896, 50S  
447 ribosomal subunit) and required cochaperones (Gsulp\_RT22\_99\_G4499, Hsp40). Three  
448 candidate genes were solute transporters (Gsulp\_RT22\_67\_G2013, Gsulp\_RT22\_118\_G6841,  
449 Gsulp\_RT22\_67\_G1991). Most interestingly, two genes connected to temperature stress were  
450 also affected by mutations. An error-prone iota DNA-directed DNA polymerase  
451 (01\_Gsulp\_RT22\_79\_G2795), which promotes adaptive point mutation as part of the  
452 coordinated cellular response to environmental stress, was affected at 28°C (Napolitano et al.,  
453 2000; McKenzie et al., 2001), as well as the 2-phosphoglycerate kinase, which catalyzes the  
454 first metabolic step of the compatible solute cyclic 2,3-diphosphoglycerate, which increases the  
455 optimal growth temperature of hyperthermophile methanogens (Santos and da Costa, 2002;  
456 Roberts, 2005).

457

#### 458 **HGT candidates are not significantly involved in temperature microevolution**

459 Horizontal gene transfer has facilitated the niche adaptation of *Galdieria* and other  
460 microorganisms by providing adaptive advantages (Schonknecht et al., 2013; Schönknecht et  
461 al., 2014; Foflonker et al., 2018). Five of the total 54 HGT gene candidates in *Galdieria*  
462 *sulphuraria* RT22 gained variants (Rossoni et al., 2019). We tested whether a more significant  
463 proportion of HGT candidates gained variants in comparison to native genes. This was not the  
464 case: HGT candidates did not significantly differ from native genes (categorical data, Fisher's  
465 exact test,  $p < 0.05$ ). Of the HGT candidates, only Gsulp\_RT22\_67\_G2013, a bacterial/archaeal  
466 APC family amino acid permease potentially involved in the saprophytic lifestyle of *Galdieria*  
467 *sulphuraria*, accumulated a significant number of mutations (12 variants).

468

#### 469 **Genes involved in differential expression were not targeted by mutation**

470 We tested if the 6.1% of genes that gained variants were also differentially expressed during a  
471 temperature-sensitive RNA-Seq experiment in *Galdieria sulphuraria* 074W, where gene  
472 expression was measured at 28°C and 42°C (Rossoni et al., 2018). Of the 6982 sequences  
473 encoded by *G. sulphuraria* RT22, 4569 were successfully matched to an ortholog in *Galdieria*  
474 *sulphuraria* 074W (65.4%); 342 were orthologs to a variant-containing gene, representing

475 79.7% of all genes containing variants in *Galdieria sulphuraria* RT22. The dataset is  
476 representative (Wilcoxon rank sum test, Benjamini-Hochberg,  $p < 0.05$ , no differences in the  
477 distribution of variants per gene due to the sampling size). Based on this result, 36.3% of the  
478 variant-containing genes were differentially expressed. By contrast, 40.1% of the genes  
479 unaffected by variants were differentially expressed (**Figure 3B**). The difference between the  
480 two subsets was not significant (categorical data, Fisher's exact test,  $p < 0.05$ ). Hence, genes  
481 affected by variance during this microevolution experiment did not react more, or less,  
482 pronouncedly to fluctuating temperature.

### 483 **Intergenic variant hotspots**

484 Mutations that affect gene expression strength and pattern are a common target of evolutionary  
485 change (Barbosa-Morais et al., 2012). Intergenic DNA encodes *cis*-regulatory elements, such  
486 as promoters and enhancers, that constitute the binding sites of transcription factors and, thus,  
487 affect activation and transcriptional rate of genes. Promoters are required for transcriptional  
488 initiation but their presence alone results in minimal levels of downstream sequence  
489 transcription. Enhancers, which can be located either upstream, downstream, or distant from  
490 the genes they regulate, are the main drivers of gene transcription intensity and are often thought  
491 to be the critical factors of *cis*-regulatory divergence (Wray, 2007). Further, epigenetic changes  
492 can lead to heritable phenotypic and physiological changes without the alteration of the DNA  
493 sequence (Dupont et al., 2009). As a consequence of its evolutionary history, the genome of  
494 *Galdieria sulphuraria* is highly deprived of non-functional DNA (Qiu et al., 2015). Here, we  
495 performed variant enrichment analysis of the intergenic space based on *k*-mers ranging from *k*-  
496 mer length 1 (4 possible combinations, A|C|G|T) to *k*-mer length 10 (1,048,576 possible  
497 combinations) to identify intergenic sequence patterns prone to variant accumulation (**Table**  
498 **1**). The enriched *k*-mers were screened and annotated against the PlantCARE (Lescot et al.,  
499 2002) database containing annotations of plant *cis*-acting regulatory elements. Only partial hits  
500 were found, possibly due to the large evolutionary distance between plants and red algae, more  
501 specifically the *Galdieria* lineage, which might explain the divergence between *cis*-regulatory  
502 sequences (Wittkopp and Kalay, 2012). The sequence “CG”, which is the common denominator  
503 of CpG islands (Deaton and Bird, 2011), was found enriched within the *k*-mer set of length 2.  
504 In addition, partial hits to the PlantCARE database with a *k*-mer length  $> 5$  were considered as  
505 potential hits. Using this threshold, we found three annotated binding motifs, the OCT  
506 (octamer-binding motif) (Zhao, 2013), RE1 (Repressor Element 1) (Paonessa et al., 2016), and  
507 3-AF1 (accessory factor binding sites) (Scott et al., 1996; Rhen and Cidlowski, 2005).

| kmer size | Sequence | Variant | Non-Variant | Fisher's p (BH) | Annotation             | Sequence                                | PlantCARE Comments                                                                                                                                                                                                                                                                               |
|-----------|----------|---------|-------------|-----------------|------------------------|-----------------------------------------|--------------------------------------------------------------------------------------------------------------------------------------------------------------------------------------------------------------------------------------------------------------------------------------------------|
| 2         | CG       | 45      | 81329       | 5.8819E-06      | CpG Island             | CG                                      | NA                                                                                                                                                                                                                                                                                               |
| 2         | TT       | 71      | 483528      | 3.4026E-05      | > 30 Hits              | various                                 | various                                                                                                                                                                                                                                                                                          |
|           |          |         |             |                 | > 100 Hits             | various                                 | various                                                                                                                                                                                                                                                                                          |
|           |          |         |             |                 | Part of: JERE          | AGACCGCC                                | Jasmonate and elicitor-responsive element                                                                                                                                                                                                                                                        |
|           |          |         |             |                 | Part of: ABRE          | various                                 | ACGT-containing ABA Response Element                                                                                                                                                                                                                                                             |
|           |          |         |             |                 | Part of: C-box         | ACGAGCACCGCC                            | cis-acting regulatory element involved in light responsiveness                                                                                                                                                                                                                                   |
|           |          |         |             |                 | Part of: Chs-unit      | various                                 | various                                                                                                                                                                                                                                                                                          |
|           |          |         |             |                 | Part of: RbcS-CMA7c    | various                                 | various                                                                                                                                                                                                                                                                                          |
|           |          |         |             |                 | Part of: E2Fb          | TTTGCCGC                                | G1-M transition of cell cycle                                                                                                                                                                                                                                                                    |
|           |          |         |             |                 | Part of: GC-motiv      | various                                 | various                                                                                                                                                                                                                                                                                          |
|           |          |         |             |                 | Part of: GC-repeat     | GGCCTCGCCACG                            | ?                                                                                                                                                                                                                                                                                                |
|           |          |         |             |                 | Part of: Box-C         | TATTACCTGGTCACGCTTCATA                  | cis-acting element involved in the basal expression of the PR1 genes                                                                                                                                                                                                                             |
|           |          |         |             |                 | Part of: GRA           | CACTGGCCGCCC                            | important for transcription in leaves                                                                                                                                                                                                                                                            |
|           |          |         |             |                 | Part of: OCT           | CGCGGATC                                | Part of the histone H4 gene promoter, which can express H4C7 under inducing or non-inducing conditions. Cell division is accompanied by a concomitant activation of histone genes which produces equivalent amounts of core histones to be incorporated with newly replicated DNA into chromatin |
|           |          |         |             |                 | Part of: RE1           | GGGCGCGGAACAAGGATCGGCGGCCACGCC          | repressing element                                                                                                                                                                                                                                                                               |
|           |          |         |             |                 | Part of: > 30 Elements | various                                 | various                                                                                                                                                                                                                                                                                          |
| 3         | TTT      | 38      | 183031      | 0.0117          | Part of: RE1           | GGGCGCGGAACAAGGATCGGCGGCCACGCC          | repressing element                                                                                                                                                                                                                                                                               |
|           |          |         |             |                 | Part of: Unnamed_7     | TTTCTTGCGTTTTTTGGCATAT                  | ?                                                                                                                                                                                                                                                                                                |
|           |          |         |             |                 | Part of: GTGGC-motif   | various                                 | part of the rbcA conserved DNA module array (rbcA-CMA1) involved in light responsiveness                                                                                                                                                                                                         |
|           |          |         |             |                 | Part of: E2F           | AGTGCGGNNNNNTTTGAA                      | G1-M transition of cell cycle                                                                                                                                                                                                                                                                    |
|           |          |         |             |                 | Part of: As-1-Box      | TGACGAATGCGATGACC                       | involved in various stress-responses correlated with auxin; salicylic acid and methyl jasmonate                                                                                                                                                                                                  |
|           |          |         |             |                 | Part of: ABRE          | various                                 | ACGT-containing ABA Response Element                                                                                                                                                                                                                                                             |
|           |          |         |             |                 | Part of: GC-motiv      | various                                 | enhancer-like element involved in anoxic specific inducibility                                                                                                                                                                                                                                   |
|           |          |         |             |                 | Part of: Sp1 Motif I   | GGGCGG                                  | involved in light responsiveness                                                                                                                                                                                                                                                                 |
|           |          |         |             |                 | Part of: Re2f-1        | GCGGGAAA                                | Putative E2F binding sites in the rice PCNA promoter mediate activation in actively dividing cells                                                                                                                                                                                               |
|           |          |         |             |                 | Part of: ACE           | GCGACGTACC                              | cis-acting element in promoter and enhancer; involved in light responsiveness                                                                                                                                                                                                                    |
|           |          |         |             |                 | Part of: I-Box         | various                                 | part of a light responsive element                                                                                                                                                                                                                                                               |
|           |          |         |             |                 | Part of: OCT           | CGCGGATC                                | Part of the histone H3 gene promoter, which can express H3C4 under inducing or non-inducing conditions. Cell division is accompanied by a concomitant activation of histone genes which produces equivalent amounts of core histones to be incorporated with newly replicated DNA into chromatin |
|           |          |         |             |                 | Part of: CHS unit 11   | AGTCGTGGCCATCCATCCTCCGTCATGGACCTAACCCGC | sequence consisting of three modules; enough to make light inducing possible                                                                                                                                                                                                                     |
|           |          |         |             |                 | Part of: RbcS-CMA7c    | ACGCAGTGTGTGGAGGAGCA                    | part of a light responsive element                                                                                                                                                                                                                                                               |
|           |          |         |             |                 | Part of: RE1           | GGGCGCGGAACAAGGATCGGCGGCCACGCC          | repressing element                                                                                                                                                                                                                                                                               |
| 5         | CGCGG    | 4       | 230         | 0.0139          | Part of: OCT           | CGCGGATC                                | Part of the histone H4 gene promoter, which can express H4C7 under inducing or non-inducing conditions. Cell division is accompanied by a concomitant activation of histone genes which produces equivalent amounts of core histones to be incorporated with newly replicated DNA into chromatin |
|           |          |         |             |                 | Part of: I-Box         | cCATATCCAAT                             | part of a light responsive element                                                                                                                                                                                                                                                               |
| 5         | CATAT    | 14      | 6311        | 0.0196          | Part of: Unnamed_7     | TTTCTTGCGTTTTTTGGCATAT                  | ?                                                                                                                                                                                                                                                                                                |
| 5         | GAGAG    | 11      | 4444        | 0.0336          | Part of: 3-AF1         | TAAGAGAGGAA                             | light responsive element                                                                                                                                                                                                                                                                         |
|           |          |         |             |                 | Part of: RE1           | GGGCGCGGAACAAGGATCGGCGGCCACGCC          | repressing element                                                                                                                                                                                                                                                                               |
| 6         | CGCGGA   | 4       | 57          | 0.0005          | Part of: OCT           | CGCGGATC                                | Part of the histone H4 gene promoter, which can express H4C7 under inducing or non-inducing conditions. Cell division is accompanied by a concomitant activation of histone genes which produces equivalent amounts of core histones to be incorporated with newly replicated DNA into chromatin |
| 6         | GAGAGA   | 11      | 2273        | 0.0024          | NA                     | NA                                      | NA                                                                                                                                                                                                                                                                                               |
| 6         | AGAGAG   | 10      | 2182        | 0.0067          | Part of: 3-AF1         | TAAGAGAGGAA                             | light responsive element                                                                                                                                                                                                                                                                         |
| 6         | AGCGCG   | 3       | 46          | 0.0067          | Part of: GC-motif      | AGCGCGCCG                               | ?                                                                                                                                                                                                                                                                                                |
| 6         | CGGGAT   | 4       | 195         | 0.0112          | NA                     | NA                                      | NA                                                                                                                                                                                                                                                                                               |
| 6         | GCGCGG   | 3       | 66          | 0.0112          | Part of: RE1           | GCGCGG                                  | repressing element                                                                                                                                                                                                                                                                               |
| 6         | TCGGGA   | 4       | 210         | 0.0114          | NA                     | NA                                      | NA                                                                                                                                                                                                                                                                                               |
| 6         | GAGCGC   | 3       | 110         | 0.0409          | NA                     | NA                                      | NA                                                                                                                                                                                                                                                                                               |
| 7         | GAGAGAG  | 11      | 1071        | < 0.0001        | NA                     | NA                                      | NA                                                                                                                                                                                                                                                                                               |
| 7         | GCGCGGA  | 3       | 3           | < 0.0001        | Part of: RE1           | GGG(CGCGG)AACAAGG...                    | repressing element                                                                                                                                                                                                                                                                               |
| 7         | CGCGGAC  | 3       | 6           | 0.0003          | NA                     | NA                                      | NA                                                                                                                                                                                                                                                                                               |
| 7         | AGCGCGG  | 3       | 7           | 0.0003          | NA                     | NA                                      | NA                                                                                                                                                                                                                                                                                               |
| 7         | AGAGAGA  | 10      | 1284        | 0.0007          | NA                     | NA                                      | NA                                                                                                                                                                                                                                                                                               |
| 7         | GAGCGCG  | 3       | 13          | 0.0009          | NA                     | NA                                      | NA                                                                                                                                                                                                                                                                                               |
| 7         | TCGGGAT  | 4       | 80          | 0.0020          | NA                     | NA                                      | NA                                                                                                                                                                                                                                                                                               |
| 7         | CCTTCCC  | 4       | 101         | 0.0042          | NA                     | NA                                      | NA                                                                                                                                                                                                                                                                                               |
| 7         | TTACGAG  | 4       | 103         | 0.0042          | NA                     | NA                                      | NA                                                                                                                                                                                                                                                                                               |
| 7         | CGAGACC  | 3       | 33          | 0.0066          | NA                     | NA                                      | NA                                                                                                                                                                                                                                                                                               |
| 7         | TAGAGAG  | 5       | 288         | 0.0084          | NA                     | NA                                      | NA                                                                                                                                                                                                                                                                                               |
| 7         | AATCAAG  | 6       | 523         | 0.0092          | NA                     | NA                                      | NA                                                                                                                                                                                                                                                                                               |
| 7         | TGAGCGC  | 3       | 41          | 0.0094          | NA                     | NA                                      | NA                                                                                                                                                                                                                                                                                               |
| 7         | CGGGATT  | 3       | 54          | 0.0190          | NA                     | NA                                      | NA                                                                                                                                                                                                                                                                                               |

**Table 1.** K-mer screen of intergenic regions. The non-coding sequence of *Galdieria sulphuraria* RT22 was screened using k-mers spanning 1–10 nucleotides. The k-mers of each length were tested for variant enrichment (Fisher's exact test). Only significantly enriched k-mers are shown here. K-mers longer than eight nucleotides did not produce any database hits and are not shown. **K-mer size:** length of the analyzed k-mer. **Sequence:** the sequence of the k-mer. **VARIANT:** Number of k-mers with specific sequence affected by variants. **Non-Variant:** Number of k-mers with a specific sequence not affected by variants. **Fisher's p (BH):** Benjamini-Hochberg post-hoc corrected p-value of Fisher's enrichment test. **Annotation:** PlantCARE identifier (ID) of regulatory element. "Part of:" indicates a partial hit of the k-mer sequence to the database entry. **ID Sequence:** Full sequence of the regulatory element. **PlantCARE Comments:** Additional information provided by PlantCARE.

519

## 520 **Discussion**

### 521 **Growth rates adapt to temperature**

522 In this study, we subjected two populations of *Galdieria sulphuraria* RT22 to a temperature-  
523 dependent microevolution experiment for 7 months. One culture was grown at 28°C,  
524 representing cold stress, and a control culture was grown at 42°C. This experiment aimed to  
525 uncover the genetic acclimation response to persistent stress, rather than the short-term  
526 acclimation response of *Galdieria sulphuraria* to cold stress (Rossoni et al., 2018). We  
527 performed genomic re-sequencing along the timeline to measure changes in the genome  
528 sequence of *Galdieria sulphuraria* RT22. After 7 months, corresponding to ~170 generations  
529 of growth at 42°C and ~100 generations of growth at 28°C, the cold-adapted cultures decreased  
530 their doubling time by ~30%. The control cultures maintained constant growth, although a trend  
531 to slower growth might occur (**Figure 1**). A similar increase in the growth rate was also  
532 observed in the photoautotrophic sister lineage of *Cyanidioschyzon*, where cultures of  
533 *Cyanidioschyzon merolae* 10D were grown at 25°C for a period of ~100 days, albeit under  
534 photoautotrophic conditions. This study found that the cold-adapted cultures outgrew the  
535 control culture at the end of the experiment (Nikolova et al., 2017). While faster doubling times  
536 at 28°C can be attributed to gradual adaptation to the suboptimal growth temperatures, we may  
537 only speculate about the causes leading to slower growth in the control condition (42°C).  
538 Perhaps *Galdieria sulphuraria* RT22, which originated from the Rio Tinto river near Berrocal  
539 (Spain), may be able to thrive at high temperatures, but not for such a prolonged period.

540

### 541 **Cultures grown at 28°C accumulate twice the number of mutations as compared to** 542 **controls**

543 We identified 1243 filtered variants (966 SNPs + 277 InDels), of which 757 (63.5%) were  
544 located on the coding sequence of 429 genes and 486 (36.5%) in the intergenic region. The  
545 mutation rate was estimated to be  $2.17 \times 10^{-6}$ /base/generation for samples grown at 28°C and  
546  $1.10 \times 10^{-6}$ /base/generation for samples grown at 42°C, which we interpret as an indication of  
547 greater evolutionary stress at 28°C. Hence, suboptimal growth temperatures constitute a  
548 significant stress condition and promote the accumulation of mutations. In comparison,  
549 mutation rates in other microevolution experiments were  $1.53 \times 10^{-8}$ /base/generation– $6.67 \times 10^{-$   
550  $11$ /base/generation for the unicellular green freshwater alga *Chlamydomonas reinhardtii* and  
551  $5.9 \times 10^{-9}$ /base/generation in the green plant *Arabidopsis thaliana* (Ness et al., 2012; Sung et al.,  
552 2012; Perrineau et al., 2014). The 100-fold higher evolutionary rates in comparison to

553 *Chlamydomonas reinhardtii* might result from the selective strategy employed in this  
554 experiment (only the five biggest colonies were selected to start the next generations). Although  
555 the cold-stressed samples accumulated twice as many mutations per generation in comparison  
556 to the control condition, the number of gained variants over the same period was higher in the  
557 42°C cultures due to faster growth rates.

558

### 559 **Cell cycle and transcription factors are the main drivers of temperature adaptation**

560 The impact of temperature-driven microevolution on the cellular functions of *Galdieria*  
561 *sulphuraria* RT22 was analyzed using GO enrichment analysis. More than 75% of the 234  
562 significantly enriched GOs affected genes functions involved in the processes of cell division,  
563 cell structure, gene regulation, and signaling. In short, the cellular life cycle appears to be  
564 targeted by variation at any stage starting with mitosis, morphogenesis, and finishing with  
565 programmed cell death. By contrast, genes directly affecting metabolic processes were less  
566 affected by mutation and made up only 10% of the enriched GOs. These observations were also  
567 confirmed through the functional annotation of the seven genes most affected by variants  
568 ("variant hotspots") as well as the 13 genes carrying non-synonymous variants with non-  
569 random evolutionary patterns.

570

### 571 **The intergenic space in *Galdieria* is equally affected as coding regions**

572 Historically, intergenic DNA has frequently been considered to represent non-functional DNA.  
573 It is now generally accepted that mutations affecting intergenic space can heavily influence the  
574 expression intensity and expression patterns of genes. Variants altering the sequence of *cis*-  
575 regulatory elements are a common source of evolutionary change (Wittkopp and Kalay, 2012).  
576 Due to two phases of genome reduction (Qiu et al., 2015), the genome of *Galdieria* is highly  
577 streamlined and the intergenic space accounts for only 36% of its sequence. As a consequence,  
578 it is assumed that *G. sulphuraria* lost non-functional intergenic regions that are affected by high  
579 random mutation rates in other organisms. In this experiment, variants accumulated  
580 proportionally between the genic and the intergenic space, which we interpret as an indication  
581 of high relevance of the non-coding regions in *Galdieria*. K-mer analysis revealed significant  
582 enrichment of variants occurring in CpG islands. CpG islands heavily influence transcription  
583 on the epigenetic level through methylation of the cytosines. In mammals, up to 80% of the  
584 cytosines in CpG islands can be methylated, and heavily influence epigenetic gene expression  
585 regulation. Furthermore, they represent the most common promoter type in the human genome,  
586 affecting transcription of almost all housekeeping genes and the portions of developmental



587 regulator genes (Jabbari and Bernardi, 2004; Saxonov et al., 2006; Zhu et al., 2008). Hence,  
588 temperature adaptation is not only modulated through accumulation of mutations in the genetic  
589 region but equally driven by the alteration of gene expression through epigenetics and mutations  
590 affecting the non-coding region.

591

## 592 **Conclusion**

593 We show here that the significant growth enhancement of samples grown at 28°C over more  
594 than 100 generations was driven mainly by mutations in genes involved in the cell cycle, gene  
595 regulation, and signal transfer, as well as mutations that occurred in the intergenic regions,  
596 possibly changing the epigenetic methylation pattern and altering the binding specificity to *cis*-  
597 regulatory elements. Our data indicate the absence of a few specific “key” temperature  
598 switches. Rather, it appears that the evolution of temperature tolerance is underpinned by a  
599 systems response which requires the gradual adaptation of an intricate gene expression network  
600 and deeply nested regulators (transcription factors, signaling cascades, *cis*-regulatory  
601 elements). Our results also emphasize the difference between short-term acclimation and long-  
602 term adaptation with regard to temperature stress, highlighting the multiple facets of adaptation  
603 that can be measured using different technologies. The short-term stress response of *Galdieria*  
604 *sulphuraria* and the long-term stress response in *Cyanidioschyzon merolae* were quantified  
605 using transcriptomic and proteomic approaches, respectively (Nikolova et al., 2017; Rossoni et  
606 al., 2018). At the transcriptional and translational levels, both organisms reacted towards  
607 maintaining energetic and metabolic homeostasis by increased protein concentrations, adjusting  
608 the protein folding machinery, changing degradation pathways, regulating compatible solutes,  
609 remodeling of the photosynthetic machinery, and tuning the photosynthetic capacity. SNP and  
610 InDel calling revealed underlying regulators mostly affected by variation which are potential  
611 drivers of altered transcript and protein concentrations and ultimately determine physiology and  
612 phenotype. Some issues, however, remained unresolved. Is the observed growth phenotype  
613 permanent, or is it mostly derived from epigenetic modification which could be quickly  
614 reversed? We also did not investigate the temperature-dependent differential splicing  
615 (Bhattacharya et al., 2018; Qiu et al., 2018) apparatus in *Galdieria*, or the impact of non-coding  
616 RNA elements, both of which may provide additional layers for adaptive evolution (van Bakel  
617 et al., 2010).

618

619

## 620 **Acknowledgements**

621

622 This work was supported by the Deutsche Forschungsgemeinschaft under Germany's  
623 Excellence Strategy – EXC-2048/1 – Project ID: 390686111 and DFG-ANR grant Mo-MiX  
624 (WE 2231/21-1). We thank the “Genomics and Transcriptomics laboratory” of the “Biologisch-  
625 Medizinischen Forschungszentrum” (BMFZ) at the Heinrich-Heine-University of Düsseldorf  
626 (Germany) for technical support and conducting the Illumina sequencing.

627

628

629

630

631



632 **References**

- 633 Barbosa-Morais, N.L., Irimia, M., Pan, Q., Xiong, H.Y., Gueroussov, S., Lee, L.J., et al.  
634 (2012). The evolutionary landscape of alternative splicing in vertebrate species.  
635 *Science* 338(6114), 1587-1593. doi: 10.1126/science.1230612.
- 636 Barcytė, D., Elster, J., and Nedbalová, L. (2018). Plastid-encoded rbcL phylogeny suggests  
637 widespread distribution of *Galdieria phlegrea* (Cyanidiophyceae, Rhodophyta). *Nordic*  
638 *Journal of Botany* 36(7), e01794. doi: 10.1111/njb.01794.
- 639 Benton, M.J. (2008). *When life nearly died: the greatest mass extinction of all time*. Thames  
640 & Hudson.
- 641 Bhattacharya, D., Qiu, H., Lee, J., Yoon, H.S., Weber, A.P.M., and Price, D.C. (2018). When  
642 Less is More: Red Algae as Models for Studying Gene Loss and Genome Evolution in  
643 Eukaryotes. *Critical Reviews in Plant Sciences* 37(1), 81-99. doi:  
644 10.1080/07352689.2018.1482364.
- 645 Bird, A. (2002). DNA methylation patterns and epigenetic memory. *Genes Dev* 16(1), 6-21.  
646 doi: 10.1101/gad.947102.
- 647 Brouhard, G.J., and Rice, L.M. (2018). Microtubule dynamics: an interplay of biochemistry  
648 and mechanics. *Nat Rev Mol Cell Biol* 19(7), 451-463. doi: 10.1038/s41580-018-0009-  
649 y.
- 650 Burgess, S.D., Bowring, S., and Shen, S.-z. (2014). High-precision timeline for Earth's most  
651 severe extinction. *Proceedings of the National Academy of Sciences*.
- 652 Castenholz, R.W., and McDermott, T.R. (2010). "The Cyanidiales: ecology, biodiversity, and  
653 biogeography," in *Red Algae in the Genomic Age*. Springer), 357-371.
- 654 Cingolani, P., Platts, A., Wang, L.L., Coon, M., Nguyen, T., Wang, L., et al. (2012). A  
655 program for annotating and predicting the effects of single nucleotide polymorphisms,  
656 SnpEff: SNPs in the genome of *Drosophila melanogaster* strain w1118; iso-2; iso-3.  
657 *Fly* 6(2), 80-92.
- 658 Ciniglia, C., Yoon, H.S., Pollio, A., Pinto, G., and Bhattacharya, D. (2004). Hidden  
659 biodiversity of the extremophilic Cyanidiales red algae. *Mol Ecol* 13(7), 1827-1838.  
660 doi: 10.1111/j.1365-294X.2004.02180.x.
- 661 D'Amico, S., Claverie, P., Collins, T., Georgette, D., Gratia, E., Hoyoux, A., et al. (2002).  
662 Molecular basis of cold adaptation. *Philos Trans R Soc Lond B Biol Sci* 357(1423),  
663 917-925. doi: 10.1098/rstb.2002.1105.
- 664 Deaton, A.M., and Bird, A. (2011). CpG islands and the regulation of transcription. *Genes*  
665 *Dev* 25(10), 1010-1022. doi: 10.1101/gad.2037511.
- 666 DePristo, M.A., Banks, E., Poplin, R., Garimella, K.V., Maguire, J.R., Hartl, C., et al. (2011).  
667 A framework for variation discovery and genotyping using next-generation DNA  
668 sequencing data. *Nature Genetics* 43(5), 491-+. doi: 10.1038/ng.806.
- 669 Detrich, H.W., 3rd, Parker, S.K., Williams, R.C., Jr., Nogales, E., and Downing, K.H. (2000).  
670 Cold adaptation of microtubule assembly and dynamics. Structural interpretation of  
671 primary sequence changes present in the alpha- and beta-tubulins of Antarctic fishes. *J*  
672 *Biol Chem* 275(47), 37038-37047. doi: 10.1074/jbc.M005699200.
- 673 Doemel, W.N., and Brock, T. (1971). The physiological ecology of *Cyanidium caldarium*.  
674 *Microbiology* 67(1), 17-32.
- 675 Dupont, C., Armant, D.R., and Brenner, C.A. (Year). "Epigenetics: definition, mechanisms  
676 and clinical perspective", in: *Seminars in reproductive medicine*: NIH), 351.
- 677 Foflonker, F., Mollegard, D., Ong, M., Yoon, H.S., and Bhattacharya, D. (2018). Genomic  
678 Analysis of *Picochlorum* Species Reveals How Microalgae May Adapt to Variable  
679 Environments. *Molecular Biology and Evolution*. doi: 10.1093/molbev/msy167.
- 680 Gross, W. (2000). Ecophysiology of algae living in highly acidic environments.  
681 *Hydrobiologia* 433(1-3), 31-37. doi: Doi 10.1023/A:1004054317446.

- 682 Gross, W., Oesterhelt, C., Tischendorf, G., and Lederer, F. (2002). Characterization of a non-  
683 thermophilic strain of the red algal genus *Galdieria* isolated from Soos (Czech  
684 Republic). *European Journal of Phycology* 37(3), 477-483.
- 685 Hendry, A.P., and Kinnison, M.T. (1999). Perspective: The Pace of Modern Life: Measuring  
686 Rates of Contemporary Microevolution. *Evolution* 53(6), 1637-1653. doi:  
687 10.1111/j.1558-5646.1999.tb04550.x.
- 688 Hew, C.S., Krotkov, G., and Canvin, D.T. (1969). Effects of Temperature on Photosynthesis  
689 and Co<sub>2</sub> Evolution in Light and Darkness by Green Leaves. *Plant Physiology* 44(5),  
690 671-&. doi: DOI 10.1104/pp.44.5.671.
- 691 Himes, R.H., and Detrich, H.W. (1989). Dynamics of Antarctic Fish Microtubules at Low-  
692 Temperatures. *Biochemistry* 28(12), 5089-5095. doi: DOI 10.1021/bi00438a028.
- 693 Hsieh, C.J., Zhan, S.H., Liao, C.P., Tang, S.L., Wang, L.C., Watanabe, T., et al. (2018). The  
694 effects of contemporary selection and dispersal limitation on the community assembly  
695 of acidophilic microalgae. *Journal of phycology* 54(5), 720-733.
- 696 Huertas, I.E., Rouco, M., Lopez-Rodas, V., and Costas, E. (2011). Warming will affect  
697 phytoplankton differently: evidence through a mechanistic approach. *Proceedings of*  
698 *the Royal Society B-Biological Sciences* 278(1724), 3534-3543. doi:  
699 10.1098/rspb.2011.0160.
- 700 Iovinella, M., Eren, A., Pinto, G., Pollio, A., Davis, S.J., Cennamo, P., et al. (2018). Cryptic  
701 dispersal of Cyanidiophytina (Rhodophyta) in non-acidic environments from Turkey.  
702 *Extremophiles*, 1-11.
- 703 Jabbari, K., and Bernardi, G. (2004). Cytosine methylation and CpG, TpG (CpA) and TpA  
704 frequencies. *Gene* 333, 143-149. doi: 10.1016/j.gene.2004.02.043.
- 705 Jenuwein, T., and Allis, C.D. (2001). Translating the histone code. *Science* 293(5532), 1074-  
706 1080. doi: 10.1126/science.1063127.
- 707 Kolbert, E. (2014). *The sixth extinction : an unnatural history*. First edition. New York :  
708 Henry Holt and Company, 2014.
- 709 Lescot, M., Dehais, P., Thijs, G., Marchal, K., Moreau, Y., Van de Peer, Y., et al. (2002).  
710 PlantCARE, a database of plant cis-acting regulatory elements and a portal to tools for  
711 in silico analysis of promoter sequences. *Nucleic Acids Res* 30(1), 325-327.
- 712 Li, H., and Durbin, R. (2009). Fast and accurate short read alignment with Burrows-Wheeler  
713 transform. *Bioinformatics* 25(14), 1754-1760. doi: 10.1093/bioinformatics/btp324.
- 714 López-Rodas, V., Costas, E., Maneiro, E., Marvá, F., Rouco, M., Delgado, A., et al. (2009).  
715 Living in Vulcan's forge: Algal adaptation to stressful geothermal ponds on Vulcano  
716 Island (southern Italy) as a result of pre-selective mutations. *Phycological research*  
717 57(2), 111-117.
- 718 Lun, A.T.L., Chen, Y., and Smyth, G.K. (2016). "It's DE-licious: A Recipe for Differential  
719 Expression Analyses of RNA-seq Experiments Using Quasi-Likelihood Methods in  
720 edgeR," in *Statistical Genomics: Methods and Protocols*, eds. E. Mathé & S. Davis.  
721 (New York, NY: Springer New York), 391-416.
- 722 McElwain, J.C., and Punyasena, S.W. (2007). Mass extinction events and the plant fossil  
723 record. *Trends Ecol Evol* 22(10), 548-557. doi: 10.1016/j.tree.2007.09.003.
- 724 McKenna, A., Hanna, M., Banks, E., Sivachenko, A., Cibulskis, K., Kernytsky, A., et al.  
725 (2010). The Genome Analysis Toolkit: a MapReduce framework for analyzing next-  
726 generation DNA sequencing data. *Genome Res* 20(9), 1297-1303. doi:  
727 10.1101/gr.107524.110.
- 728 McKenzie, G.J., Lee, P.L., Lombardo, M.-J., Hastings, P., and Rosenberg, S.M. (2001). SOS  
729 mutator DNA polymerase IV functions in adaptive mutation and not adaptive  
730 amplification. *Molecular cell* 7(3), 571-579.

- 731 Napolitano, R., Janel-Bintz, R., Wagner, J., and Fuchs, R. (2000). All three SOS-inducible  
732 DNA polymerases (Pol II, Pol IV and Pol V) are involved in induced mutagenesis.  
733 *The EMBO journal* 19(22), 6259-6265.
- 734 Ness, R.W., Morgan, A.D., Colegrave, N., and Keightley, P.D. (2012). Estimate of the  
735 spontaneous mutation rate in *Chlamydomonas reinhardtii*. *Genetics* 192(4), 1447-  
736 1454. doi: 10.1534/genetics.112.145078.
- 737 Nikolova, D., Weber, D., Scholz, M., Bald, T., Scharsack, J.P., and Hippler, M. (2017).  
738 Temperature-Induced Remodeling of the Photosynthetic Machinery Tunes  
739 Photosynthesis in the Thermophilic Alga *Cyanidioschyzon merolae*. 174(1), 35-46.  
740 doi: 10.1104/pp.17.00110 %J Plant Physiology.
- 741 Osundeko, O., Dean, A.P., Davies, H., and Pittman, J.K. (2014). Acclimation of microalgae to  
742 wastewater environments involves increased oxidative stress tolerance activity. *Plant*  
743 *Cell Physiol* 55(10), 1848-1857. doi: 10.1093/pcp/pcu113.
- 744 Palumbi, S.R. (2001). Evolution - Humans as the world's greatest evolutionary force. *Science*  
745 293(5536), 1786-1790. doi: DOI 10.1126/science.293.5536.1786.
- 746 Paonessa, F., Criscuolo, S., Sacchetti, S., Amoroso, D., Scarongella, H., Pecoraro Bisogni, F.,  
747 et al. (2016). Regulation of neural gene transcription by optogenetic inhibition of the  
748 RE1-silencing transcription factor. *Proc Natl Acad Sci U S A* 113(1), E91-100. doi:  
749 10.1073/pnas.1507355112.
- 750 Perrineau, M.M., Gross, J., Zelzion, E., Price, D.C., Levitan, O., Boyd, J., et al. (2014). Using  
751 Natural Selection to Explore the Adaptive Potential of *Chlamydomonas reinhardtii*.  
752 *Plos One* 9(3), e92533. doi: 10.1371/journal.pone.0092533.
- 753 Qiu, H., Price, D.C., Weber, A.P., Reeb, V., Yang, E.C., Lee, J.M., et al. (2013). Adaptation  
754 through horizontal gene transfer in the cryptoendolithic red alga *Galdieria phlegrea*.  
755 *Curr Biol* 23(19), R865-866. doi: 10.1016/j.cub.2013.08.046.
- 756 Qiu, H., Price, D.C., Yang, E.C., Yoon, H.S., and Bhattacharya, D. (2015). Evidence of  
757 ancient genome reduction in red algae (Rhodophyta). *J Phycol* 51(4), 624-636. doi:  
758 10.1111/jpy.12294.
- 759 Qiu, H., Rossoni, A.W., Weber, A.P.M., Yoon, H.S., and Bhattacharya, D. (2018).  
760 Unexpected conservation of the RNA splicing apparatus in the highly streamlined  
761 genome of *Galdieria sulphuraria*. *BMC Evol Biol* 18(1), 41. doi: 10.1186/s12862-018-  
762 1161-x.
- 763 Reeb, V., and Bhattacharya, D. (2010). "The thermo-acidophilic cyanidiophyceae  
764 (Cyanidiales)," in *Red algae in the genomic age*. Springer), 409-426.
- 765 Rhen, T., and Cidrowski, J.A. (2005). Antiinflammatory action of glucocorticoids - New  
766 mechanisms for old drugs. *New England Journal of Medicine* 353(16), 1711-1723.  
767 doi: DOI 10.1056/NEJMra050541.
- 768 Roberts, M.F. (2005). Organic compatible solutes of halotolerant and halophilic  
769 microorganisms. *Saline systems* 1(1), 5.
- 770 Robinson, M.D., McCarthy, D.J., and Smyth, G.K. (2010). edgeR: a Bioconductor package  
771 for differential expression analysis of digital gene expression data. *Bioinformatics*  
772 26(1), 139-140. doi: 10.1093/bioinformatics/btp616.
- 773 Romero-Lopez, J., Lopez-Rodas, V., and Costas, E. (2012). Estimating the capability of  
774 microalgae to physiological acclimatization and genetic adaptation to petroleum and  
775 diesel oil contamination. *Aquat Toxicol* 124-125, 227-237. doi:  
776 10.1016/j.aquatox.2012.08.001.
- 777 Rossoni, A.W., Price, D.C., Seger, M., Lyska, D., Lammers, P., Bhattacharya, D., et al.  
778 (2019). The genomes of polyextremophilic Cyanidiales contain 1% horizontally  
779 transferred genes with diverse adaptive functions. *bioRxiv*, 526111. doi:  
780 10.1101/526111.

- 781 Rossoni, A.W., Schönknecht, G., Lee, H.J., Rupp, R.L., Flachbart, S., Mettler-Altmann, T., et  
782 al. (2018). Cold Acclimation of the Thermoacidophilic Red Alga *Galdieria sulphuraria*  
783 - Changes in Gene Expression and Involvement of Horizontally Acquired Genes.  
784 *Plant and Cell Physiology*, pcy240-pcy240. doi: 10.1093/pcp/pcy240.
- 785 Sahney, S., and Benton, M.J. (2008). Recovery from the most profound mass extinction of all  
786 time. *Proceedings of the Royal Society B-Biological Sciences* 275(1636), 759-765.  
787 doi: 10.1098/rspb.2007.1370.
- 788 Santos, H., and da Costa, M.S. (2002). Compatible solutes of organisms that live in hot saline  
789 environments. *Environmental Microbiology* 4(9), 501-509. doi: DOI 10.1046/j.1462-  
790 2920.2002.00335.x.
- 791 Saxonov, S., Berg, P., and Brutlag, D.L. (2006). A genome-wide analysis of CpG  
792 dinucleotides in the human genome distinguishes two distinct classes of promoters.  
793 *Proc Natl Acad Sci U S A* 103(5), 1412-1417. doi: 10.1073/pnas.0510310103.
- 794 Schönknecht, G., Chen, W.H., Ternes, C.M., Barbier, G.G., Shrestha, R.P., Stanke, M., et al.  
795 (2013). Gene transfer from bacteria and archaea facilitated evolution of an  
796 extremophilic eukaryote. *Science* 339(6124), 1207-1210. doi:  
797 10.1126/science.1231707.
- 798 Schönknecht, G., Weber, A.P., and Lercher, M.J. (2014). Horizontal gene acquisitions by  
799 eukaryotes as drivers of adaptive evolution. *Bioessays* 36(1), 9-20.
- 800 Scott, D.K., Mitchell, J.A., and Granner, D.K. (1996). The orphan receptor COUP-TF binds  
801 to a third glucocorticoid accessory factor element within the phosphoenolpyruvate  
802 carboxykinase gene promoter. *Journal of Biological Chemistry* 271(50), 31909-31914.  
803 doi: DOI 10.1074/jbc.271.50.31909.
- 804 Seckbach, J. (1972). On the fine structure of the acidophilic hot-spring alga *Cyanidium*  
805 *caldarium*: a taxonomic approach. *Microbios* 5(18), 133-142.
- 806 Shen, S.Z., Crowley, J.L., Wang, Y., Bowring, S.A., Erwin, D.H., Sadler, P.M., et al. (2011).  
807 Calibrating the end-Permian mass extinction. *Science* 334(6061), 1367-1372. doi:  
808 10.1126/science.1213454.
- 809 Stockwell, C.A., Hendry, A.P., and Kinnison, M.T. (2003). Contemporary evolution meets  
810 conservation biology. *Trends in Ecology & Evolution* 18(2), 94-101. doi: Doi  
811 10.1016/S0169-5347(02)00044-7.
- 812 Sung, W., Ackerman, M.S., Miller, S.F., Doak, T.G., and Lynch, M. (2012). Drift-barrier  
813 hypothesis and mutation-rate evolution. *Proc Natl Acad Sci U S A* 109(45), 18488-  
814 18492. doi: 10.1073/pnas.1216223109.
- 815 van Bakel, H., Nislow, C., Blencowe, B.J., and Hughes, T.R. (2010). Most “dark matter”  
816 transcripts are associated with known genes. *PLoS biology* 8(5), e1000371.
- 817 Van der Auwera, G.A., Carneiro, M.O., Hartl, C., Poplin, R., Del Angel, G., Levy-  
818 Moonshine, A., et al. (2013). From FastQ data to high confidence variant calls: the  
819 Genome Analysis Toolkit best practices pipeline. *Curr Protoc Bioinformatics* 43(1),  
820 11 10 11-33. doi: 10.1002/0471250953.bi1110s43.
- 821 Voter, W.A., and Erickson, H.P. (1984). The kinetics of microtubule assembly. Evidence for a  
822 two-stage nucleation mechanism. *J Biol Chem* 259(16), 10430-10438.
- 823 Wittkopp, P.J., and Kalay, G. (2012). Cis-regulatory elements: molecular mechanisms and  
824 evolutionary processes underlying divergence. *Nature Reviews Genetics* 13(1), 59-69.  
825 doi: 10.1038/nrg3095.
- 826 Wray, G.A. (2007). The evolutionary significance of cis-regulatory mutations. *Nat Rev Genet*  
827 8(3), 206-216. doi: 10.1038/nrg2063.
- 828 Yamori, W., Hikosaka, K., and Way, D.A. (2014). Temperature response of photosynthesis in  
829 C-3, C-4, and CAM plants: temperature acclimation and temperature adaptation.  
830 *Photosynthesis Research* 119(1-2), 101-117. doi: 10.1007/s11120-013-9874-6.

- 831 Zhao, F.Q. (2013). Octamer-binding transcription factors: genomics and functions. *Front*  
832 *Biosci (Landmark Ed)* 18, 1051-1071.
- 833 Zhu, J., He, F., Hu, S., and Yu, J. (2008). On the nature of human housekeeping genes. *Trends*  
834 *Genet* 24(10), 481-484. doi: 10.1016/j.tig.2008.08.004.
- 835
